# Supplementary material for: Interinstitutional Comparison of Vancomycin Area Under the Concentration–Time Curve Estimation in Korea: Need for Standardized Operational Protocols for Therapeutic Drug Monitoring Consultation
Source: PubMed Central journal article supplement — Ann Lab Med. 2024 Sep 13;45(1):85–9. doi: 10.3343/alm.2024.0218 (PMC11609716; doi:10.3343/alm.2024.0218), 2024-09-13
Supplement: alm-45-1-85-supple.pdf [file alm-45-1-85-supple.pdf]

# **Interinstitutional Comparison of Vancomycin Area Under the Concentration–Time Curve Estimation in Korea: Need for Standardized Operational Protocols for Therapeutic Drug Monitoring Consultation**

Hyun-Ki Kim, M.D., Ph.D.<sup>1</sup>, Mikyoung Park, M.D., Ph.D.<sup>2,3</sup>, Jong Do Seo, M.D.<sup>4</sup>, Tae-Dong Jeong, M.D., Ph.D.<sup>5</sup>, and Misuk Ji, M.D., Ph.D.<sup>6</sup>

<sup>1</sup>Department of Laboratory Medicine, University of Ulsan College of Medicine, Ulsan University Hospital, Ulsan, Korea; <sup>2</sup>Department of Laboratory Medicine, Eunpyeong St. Mary's Hospital, College of Medicine, The Catholic University of Korea, Seoul, Korea;

<sup>3</sup>Department of Laboratory Medicine, Ajou University School of Medicine, Suwon, Korea;

<sup>4</sup>Department of Laboratory Medicine, Konkuk University School of Medicine, Seoul, Korea;

<sup>5</sup>Department of Laboratory Medicine, Ewha Womans University College of Medicine, Seoul, Korea; <sup>6</sup>Department of Laboratory Medicine, Veterans Health Service Medical Center, Seoul, Korea

**Supplemental Data.** Patient and therapeutic drug monitoring (TDM) data for the case challenge.

### **Case 1**

1. Sex/age (birth date)/ethnicity: **M/50 yrs (1973-03-01)/Korean**
2. Height/body weight: **170 cm/65 kg**
3. Diagnosis: methicillin-resistant *Staphylococcus aureus* (**MRSA**) **pneumonia**
4. Vancomycin dosing history: [23-06-01 09:00 (#1) – 23-06-03 09:00 (#5)]\* **900 mg q12hr IV (1-hr infusion)**

\* Infusion start time

5. Serum albumin concentration: [23-06-03 06:00] **3.1 g/dL**
6. Serum creatinine concentration: [23-06-03 06:00] **0.86 mg/dL** (76.0  $\mu\text{mol/L}$ )
7. Serum vancomycin concentrations: [23-06-02 23:30] **19.8 mg/L (peak)**, [23-06-03 08:45] **11.4 mg/L (trough)**

The time indicated in items 5 to 7 is the time of blood collection.

---

### **Case 2**

1. Sex/age (birth date)/ethnicity: **F/80 yrs (1943-03-01)/Korean**
2. Height/body weight: **155 cm/70 kg**
3. Diagnosis: **MRSA pneumonia**
4. Vancomycin dosing history: [23-06-01 09:00 (#1) – 23-06-03 09:00 (#5)]\* **1,000 mg q12hr IV (1-hr infusion)**

\* Infusion start time

5. Serum albumin concentration: [23-06-03 06:00] **3.1 g/dL**
6. Serum creatinine concentration: [23-06-03 06:00] **0.45 mg/dL** (39.8  $\mu\text{mol/L}$ )
7. Serum vancomycin concentration: [23-06-03 08:45] **14.5 mg/L**

The time indicated in items 5 to 7 is the time of blood collection.

---

### Case 3

1. Sex/age (birth date)/ethnicity: **M/50 yrs (1973-03-01)/Korean**

2. Height/body weight: **170 cm/65 kg**

3. Diagnosis: **MRSA pneumonia**

4. Vancomycin dosing history:

[23-06-01 09:00 (#1) – 23-06-03 09:00 (#5)]\* **800 mg q12hr IV (1-hr infusion)**

[23-06-03 21:00 (#6) – 23-06-06 09:00 (#11)]\* **1,000 mg q12hr IV (1-hr infusion)**

[23-06-06 21:00 (#12) – 23-06-12 09:00 (#23)]\* **800 mg q12hr IV (1-hr infusion)**

\* Infusion start time

5. Serum albumin concentration: [23-06-03 06:00] **3.1 g/dL**

6. Serum creatinine concentrations:

① [23-06-01 06:00] **1.01 mg/dL** (89.3  $\mu\text{mol/L}$ )

② [23-06-03 06:00] **0.95 mg/dL** (84.0  $\mu\text{mol/L}$ )

③ [23-06-06 06:00] **1.02 mg/dL** (90.2  $\mu\text{mol/L}$ )

④ [23-06-08 06:00] **1.22 mg/dL** (107.8  $\mu\text{mol/L}$ )

⑤ [23-06-09 06:00] **1.06 mg/dL** (93.7  $\mu\text{mol/L}$ )

⑥ [23-06-10 06:00] **0.91 mg/dL** (80.4  $\mu\text{mol/L}$ )

⑦ [23-06-12 06:00] **0.89 mg/dL** (78.7  $\mu\text{mol/L}$ )

7. Serum vancomycin concentrations:

① [23-06-03 08:45] **8.7 mg/L**

② [23-06-06 08:45] **19.1 mg/L**

③ [23-06-08 08:45] **14.8 mg/L**

④ [23-06-10 08:45] **13.9 mg/L**

⑤ [23-06-12 08:45] **14.5 mg/L**

The time indicated in items 5 to 7 is the time of blood collection.

---

**Supplemental Data Table S1.** Differences in AUC24 values according to the renal function equation used, using the same built-in population model of the MwPharm++ program for questions Q1-C and Q2

| Question | eGFR equation         | eGFR* (mL/min/1.73m <sup>2</sup> ) | AUC24 value calculated by authors <sup>†</sup> (mg·hr/L) | AUC24 values reported by respondents <sup>‡</sup> (mg·hr/L) |
|----------|-----------------------|------------------------------------|----------------------------------------------------------|-------------------------------------------------------------|
| Q1-C     | Cockcroft–Gault       | 93                                 | 479                                                      | 477, 479, 479, 481                                          |
|          | CKD-EPI (2009)        | 101                                | 477                                                      | (386), (431), 476, 477                                      |
|          | MDRD (IDMS-traceable) | 94                                 | 479                                                      | 478, 479                                                    |
|          | Jelliffe              | 85                                 | 481                                                      | 481, 481                                                    |
| Q2       | Cockcroft–Gault       | 77                                 | 653                                                      | 614, 652, 653, 653                                          |
|          | CKD-EPI (2009)        | 95                                 | 646                                                      | 620, 646, 646, 663                                          |
|          | MDRD (IDMS-traceable) | 134                                | 635                                                      | 635, 635                                                    |
|          | Jelliffe              | 77                                 | 653                                                      | (148), 653                                                  |

\*Ideal body weight calculated according to the Chennavasin equation was used for the Cockcroft–Gault and Jelliffe equations. Creatinine clearance values were normalized to a body surface area of 1.73 m<sup>2</sup>. The 1972 version of the Jelliffe equation was used (Jelliffe II in MwPharm++; Jelliffe RW and Jelliffe SM. A computer program for estimation of creatinine clearance from unstable serum creatinine levels, age, sex, and weight. *Math Biosci* 1972;14:17-24).

<sup>†</sup>Bayesian individual PK parameter estimation and time–concentration curve simulation were conducted with MwPharm++ (version 2.4.0.363; Mediware a.s., Prague, Czech Republic), using the built-in two-compartment model named “#vancomycin\_adult\_k\_C2.” The population PK parameters (mean ± SD) were V1 = 0.21 ± 0.04 L/kg, k<sub>clr</sub> = 0.00327 ± 0.00109 hr<sup>-1</sup>/(mL/min/1.73m<sup>2</sup>), k<sub>12</sub> = 1.12 ± 0.28 hr<sup>-1</sup>, and k<sub>21</sub> = 0.48 ±

$0.12 \text{ hr}^{-1}$ , where  $V_1$  is the volume of distribution of the central compartment;  $k_{\text{elr}}$  is the renal elimination rate constant for the central compartment;  $k_{12}$  is rate constant from the 1<sup>st</sup> (central) to the 2<sup>nd</sup> (peripheral) compartment; and  $k_{21}$  is rate constant from the 2<sup>nd</sup> to the 1<sup>st</sup> compartment. The metabolic elimination rate constant for the central compartment ( $k_{\text{elm}}$ ) was fixed:  $k_{\text{elm}} = 0.0143 \text{ hr}^{-1}$ . The relationship between the total elimination rate constant ( $k_{\text{el}}$ ) and creatinine clearance ( $\text{CL}_{\text{cr}}$ ) was  $k_{\text{el}} (\text{hr}^{-1}) = k_{\text{elm}} (\text{hr}^{-1}) + k_{\text{elr}} (\text{hr}^{-1}/[\text{mL}/\text{min}/1.73\text{m}^2]) \times \text{CL}_{\text{cr}} (\text{mL}/\text{min}/1.73\text{m}^2)$ , where calculated creatinine clearance or eGFR was used for  $\text{CL}_{\text{cr}}$ . All option settings, such as assay error ( $\text{SD} = 0.15 \times C_{\text{obs}}$ ), were set to default.

‡Even when the same population model and renal function equation were used in the same program, MwPharm++ provides various options, such as assay error, body weight type, fitting algorithm, and weighting method, which may lead to different AUC values depending on the settings used or owing to clerical error.

The values in parentheses are outliers excluded from the mean, SD, and CV calculations in Table 2.

Abbreviations: eGFR, estimated glomerular filtration rate; AUC<sub>24</sub>, 24 hr-normalized area under the concentration–time curve; MDRD, modification of diet in renal disease; IDMS, isotope dilution mass spectrometry.
